# Supplementary material for: Photoelectrochemical cells based on bis-aniline-crosslinked CdS nanoparticle–carbon nanotube matrices associated with electrodes
Source: Royal Society of Chemistry journal article supplement (doi:10.1039/b908609a), 2009-01-01
Supplement: b908609a.pdf [file b908609a.pdf]

**Supporting information for the paper:**

**Photoelectrochemical cells based on bis-aniline-crosslinked CdS nanoparticle–carbon nanotube matrices associated with electrodes**

*Oded Ovits, Ran Tel-Vered, Ilina Baravik, Ofer I. Wilner and Itamar Willner*

A cyclic voltammogram, measured for the CdS NP–CNT composite electrode in HEPES buffer, pH=7.4, is presented in Figure S1.

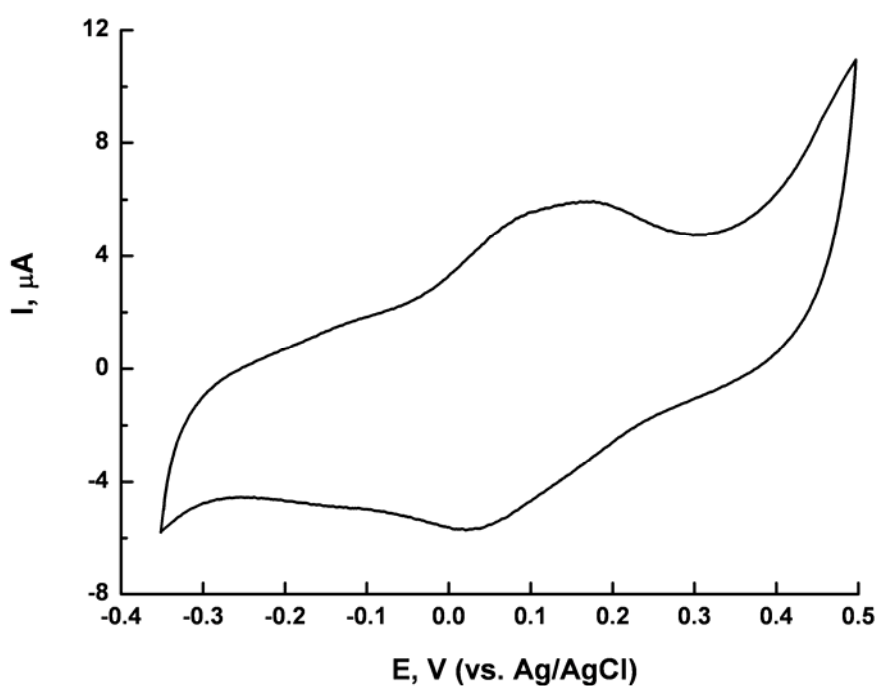

**Figure S1.** Cyclic voltammogram of the CdS NP–CNT composite electrode in HEPES buffer, 0.1 M (pH=7.4). The electrode was prepared using 80 electrochemical deposition cycles and an aniline-modified CdS NPs to aniline-tethered CNTs w/w ratio of 5.5. Scan rate: 100 mV s<sup>-1</sup>.
